# Supplementary material
Source: PubMed Central journal article supplement (PMC7705311)
Supplement: supp_RA120.013484_159539_3_supp_597162_qgrmgd.pdf [file supp_RA120.013484_159539_3_supp_597162_qgrmgd.pdf]

**Low-dose naltrexone rescues inflammation and insulin resistance associated with hyperinsulinemia**

Abhinav Choubey<sup>1,4</sup>, Khyati Girdhar<sup>1,4</sup>, Aditya K Kar<sup>2</sup>, Shaivya Kushwaha<sup>2</sup>, Manoj Kumar Yadav<sup>3</sup>, Debabrata Ghosh<sup>2</sup>, Prosenjit Mondal<sup>1,4\*</sup>

<sup>1</sup>School of Basic Sciences, Indian Institute of Technology Mandi, Mandi-175005, H.P, India.

<sup>2</sup>CSIR-Indian Institute of Toxicology Research (CSIR-IITR), Lucknow, Uttar Pradesh-226031, India.

<sup>3</sup> Department of Bioinformatics, SRM University, Delhi-NCR, Sonapat, Haryana 131029

<sup>4</sup>BioX centre, Indian Institute of Technology Mandi, H.P-175005, India.

**\* Corresponding Author**

Prosenjit Mondal, PhD.  
School of Basic Sciences,  
Indian Institute of Technology Mandi,  
Mandi-175001, H.P, India  
E-mail: [prosenjit@iitmandi.ac.in](mailto:prosenjit@iitmandi.ac.in),  
Phone No.+91-1905267262

Running title: LDN protects against systemic inflammation and insulin resistance.

**Keywords:** Low-dose Naltrexone, SIRT1, Inflammation, NF- $\kappa$ B, Hyperinsulinemia, Insulin resistance, Toll-Like Receptor 4

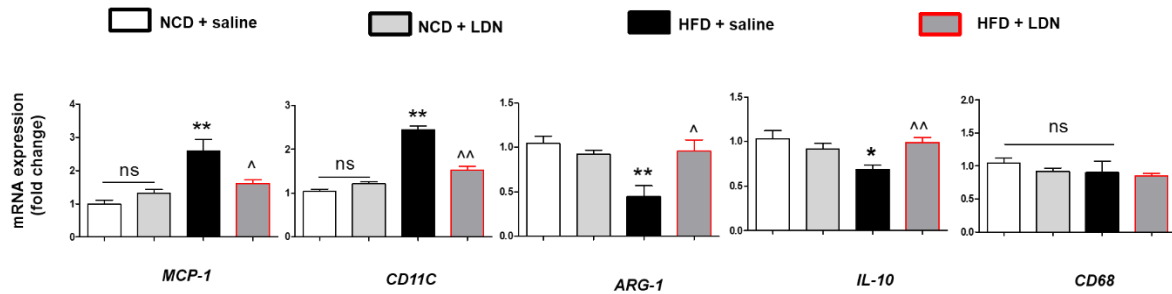

**Figure S1: Effect of LDN on hyperinsulinemia induced inflammatory genes expression:** Quantitative mRNA expression of indicated genes in diet induced hyperinsulinemic mice. Values are expressed as mean  $\pm$  SD. \*\* $P < 0.01$ , \* $P < 0.05$  NCD+saline and  $\Delta\Delta P < 0.01$ ,  $\Delta P < 0.05$  HFD+saline. (ANOVA followed by Bonferroni's Multiple Comparison).

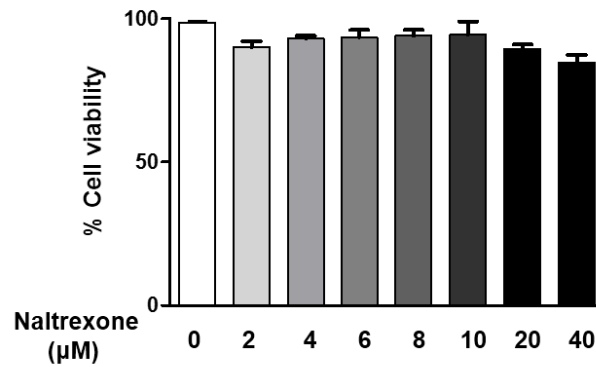

**Figure- S2: Effect of naltrexone on Raw264.7 cells viability.** Raw 264.7 (macrophage) cells were exposed to different doses of naltrexone for 24 hours (hr) and MTT assay were performed to determine the viability. Viability was represented as percentage (%) as relative to control. All data were presented as Mean  $\pm$  SD of three independent sets of experiments.

## Supporting Information

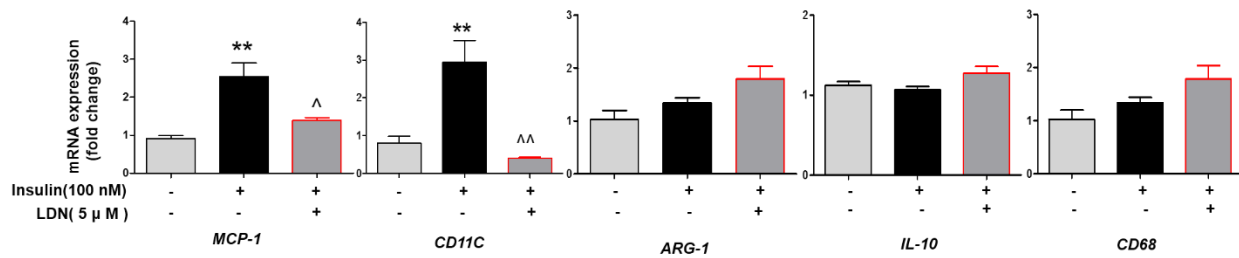

**Figure- S3: Effect of LDN on hyperinsulinemia induced inflammatory genes expression in *in-vitro*.** Macrophage cells were challenged with 100 nM insulin with or without LDN for 24 hr and indicated inflammatory modulatory genes were analysed. Values are expressed as mean  $\pm$  SD. \*\*P<0.01, \*P<0.05 Vs Control and ΔΔP<0.01, ΔP<0.05 Vs Insulin. (ANOVA followed by Bonferroni's Multiple Comparison).

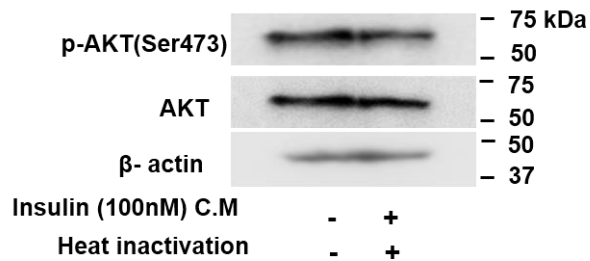

**Figure- S4:** Immunoblot for p-AKT(Ser473) in HepG2 cell lysate treated with indicated conditioned media (C.M), after heat inactivation.

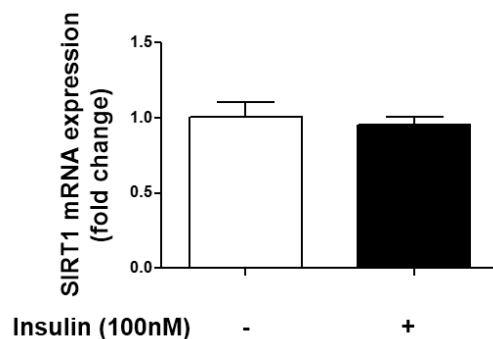

**Figure- S5:** Quantitative mRNA expression of Sirt1 mRNA levels in cells treated with or without insulin for 18 hr. Values are expressed as mean  $\pm$  SD of three independent sets of experiments.

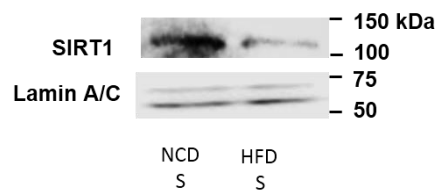

**Figure S6: Hyperinsulinemia downregulates SIRT1 protein.** IB (Immunoblot) representing nuclear SIRT1 level in white adipose tissue lysate from NCD-saline (NCD S) and HFD-saline (HFD S) group of mice.

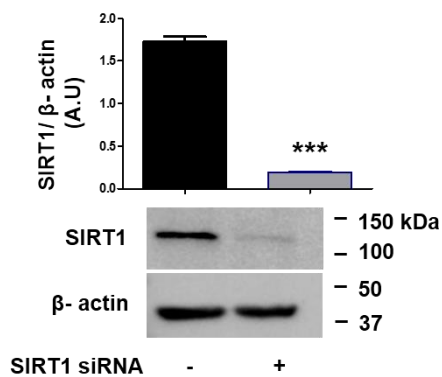

**Figure S7: SIRT1 knockdown in Raw264.7 cells.** Representative immunoblot of macrophage cell lysates shows 90% reduction of SIRT1 protein 48 hr after siRNA transfection and densitometric analysis of immunoblot. Values are expressed as mean  $\pm$  SD of three independent sets of experiments.

## Supporting Information

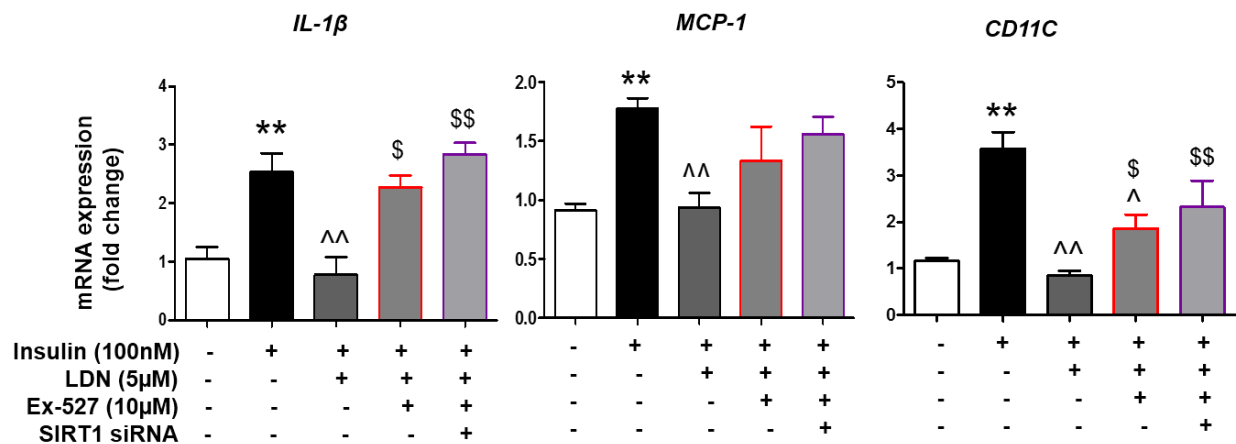

**Figure S8: LDN stimulated anti-inflammatory phenotype depends on SIRT1.** Macrophage cells were incubated with or without 100 nM insulin for 24 hr in the presence and absence of 10μM EX-527 or Sirt1 siRNA with indicated conditions and quantitative mRNA levels of inflammatory genes were analyzed. Values are expressed as mean ± SD. \*\*P<0.01, \*P<0.05, Vs Control, ^^P<0.01, ^P<0.05, Vs Insulin and \$ P<0.05, \$\$ P<0.01 Vs Insulin-LDN. (ANOVA followed by Bonferroni's Multiple Comparison).

**Table1: Antibody list**

| S.No. | Antibody                         | Species-specific | Company                  | Cat No.  |
|-------|----------------------------------|------------------|--------------------------|----------|
| 1.    | p-AKT(Ser473)                    | Rabbit           | CST                      | 4058     |
| 2     | p-AKT (Thr308)                   | Rabbit           | CST                      | 4056     |
| 3.    | AKT                              | Rabbit           | CST                      | 9272     |
| 4     | p-GSK3β (Ser9)                   | Rabbit           | CST                      | 9323     |
| 5     | GSK3β                            | Rabbit           | CST                      | 9315     |
| 6.    | SIRT1                            | Mouse            | CST                      | 2028     |
| 4.    | β-actin                          | Rabbit           | CST                      | 4970     |
| 5.    | β-actin                          | Mouse            | Santa Cruz Biotechnology | sc-47778 |
| 6.    | p-NF-κB P65(Ser536)              | Rabbit           | CST                      | 3033     |
| 7.    | NF-κB P65                        | Mouse            | CST                      | 6956     |
| 8.    | Anti-rabbit (secondary antibody) | Rabbit           | CST                      | 7074     |
| 9.    | Anti-mouse (secondary antibody)  | Mouse            | CST                      | 7076     |

## Supporting Information

**Table 2: Primer sequences**

| S.No. | Gene          | Forward primer (5'-3') | Reverse primer (3'-5') |
|-------|---------------|------------------------|------------------------|
| 1.    | MCP-1         | GAAGGAATGGGTCCAGACAT   | ACGGGTCAACTTCACATTCA   |
| 2.    | IL-1 $\beta$  | CACAGCAGCACATCAACAAG   | GTGCTCATGTCCTCATCCTG   |
| 3.    | CD11c         | ATGGAGCCTCAAGACAGGAC   | GGATCTGGGATGCTGAAATC   |
| 4.    | TLR-4         | CAATCGCATAGAGACATA     | GTTCAACATTCACCAAGA     |
| 5.    | TNF- $\alpha$ | TCTTCTCATTCCCTGCTTGTGG | GGTCTGGGCCATAGAACTGA   |
| 6.    | IL-6          | CTCTGGGAAATCGTGGAAT    | CCAGTTTGGTAGCATCCATC   |
| 7     | IL-10         | ATAACTGCACCCACTTCCCA   | GGGCATCACTTCTACCAGGT   |
| 5.    | ARG-1         | TTTTTCCAGCAGACCAGCTT   | AGAGATTATCGGAGCGCCTT   |
| 6.    | CD68          | TTGCTAGGACCGCTTATA     | AAGGATGGCAGGAGAGTA     |
| 7.    | 18-S          | GCAATTATTCCCATGAACG    | GGCCTCACTAAACCATCCAA   |

**Table 2: siRNA sequences**

| Name         | Sequence               | Species-specific | Company | Cat No. |
|--------------|------------------------|------------------|---------|---------|
| <b>SIRT1</b> | UCCGUAUCAUCUCCAAGCca   | Mouse            | AMBION  | s96764  |
| <b>SIRT1</b> | UAAUUUCGAAGUAGUUUUCcct | Mouse            | AMBION  | s96765  |
